# Supplementary material for: Rad4 Mainly Functions in Chk1-Mediated DNA Damage Checkpoint Pathway as a Scaffold Protein in the Fission Yeast Schizosaccharomyces pombe
Source: PLOS journal article supplement (doi:10.1371/journal.pone.0092936), 2014-03-24

Figure S1

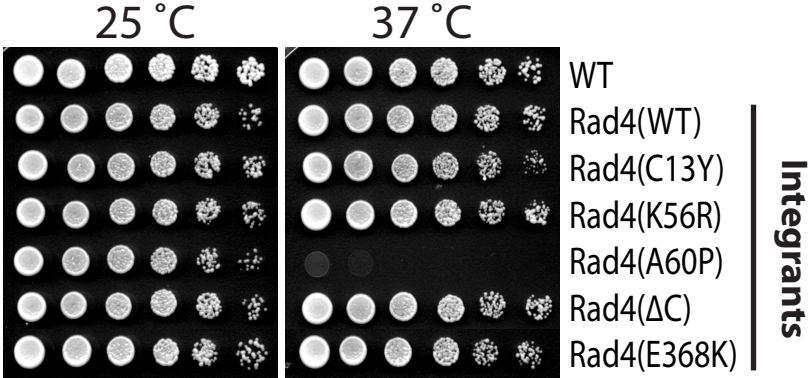

Supplement: S1 (10.1371/journal.pone.0092936.s001) [file journal.pone.0092936.s001]
